# Supplementary material
Source: PubMed Central journal article supplement (PMC3678259)

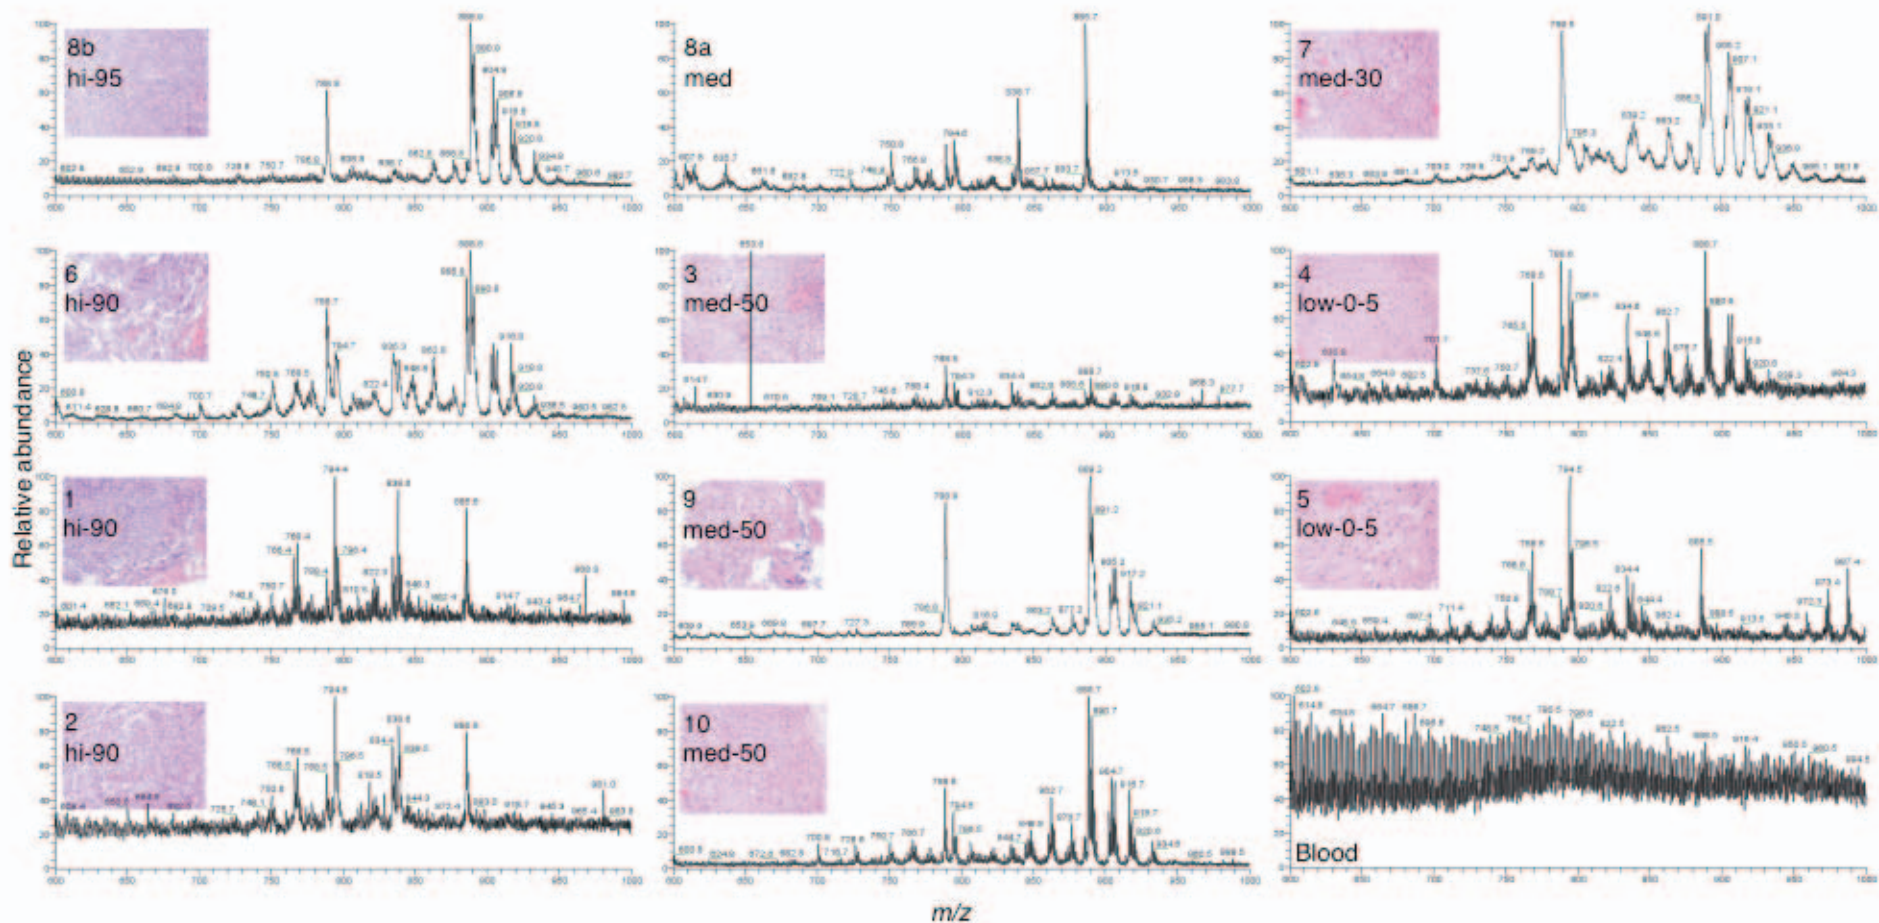

Supplement: NIHMS462124-supplement-Supplementary_data.pdf [file NIHMS462124-supplement-Supplementary_data.pdf]
